# Supplementary material
Source: PubMed Central journal article supplement (PMC3719761)
Supplement: AAC.00144-13_zac999101978so1.pdf [file AAC.00144-13_zac999101978so1.pdf]

**Table S1.** Data collection and refinement statistics

|                                         | Apo                                           | Ampicillin                                    | Carbenicillin                                 |
|-----------------------------------------|-----------------------------------------------|-----------------------------------------------|-----------------------------------------------|
| <b>Data collection</b>                  |                                               |                                               |                                               |
| Space group                             | P2 <sub>1</sub> 2 <sub>1</sub> 2 <sub>1</sub> | P2 <sub>1</sub> 2 <sub>1</sub> 2 <sub>1</sub> | P2 <sub>1</sub> 2 <sub>1</sub> 2 <sub>1</sub> |
| Cell dimensions (Å)                     |                                               |                                               |                                               |
| a, b, c (Å)                             | 84.6 / 127.8 / 54.9                           | 84.7 / 128.3 / 54.7                           | 84.8 / 127.8 / 54.7                           |
| Resolution (Å)                          | 20 - 2.0                                      | 30 - 2.1                                      | 30 - 2.0                                      |
| $R_{\text{merge}}^b$ (%)                | 5.9 (32.7)                                    | 6.6 (32.2)                                    | 6.4 (30.3)                                    |
| $I/\sigma$ ( $I$ )                      | 19.2 (2.5)                                    | 27.3 (4.5)                                    | 24.9 (4.1)                                    |
| Completeness (%)                        | 92.7 (64.02)                                  | 98.5 (88.3)                                   | 97.2 (85.2)                                   |
| Redundancy                              | 4.2 (11.9)                                    | 5.5 (3.7)                                     | 4.8 (2.9)                                     |
| <b>Structure refinement</b>             |                                               |                                               |                                               |
| Resolution (Å)                          | 20 - 2.0                                      | 30 - 2.1                                      | 30 - 2.0                                      |
| No. of reflections                      | 36557                                         | 35202                                         | 35006                                         |
| $R_{\text{work}}^c / R_{\text{free}}$   | 19.8 / 24.9                                   | 19.2 / 23.3                                   | 18.5 / 22.6                                   |
| No. atoms, Proteins/ Water              | 3768 / 74                                     | 3773 / 121                                    | 3790 / 114                                    |
| No. molecules, Glycerol                 | 1                                             | 3                                             | 3                                             |
| R.m.s.d., bond lengths (Å) / angles (°) | 0.008/1.15                                    | 0.009/1.08                                    | 0.008/1.15                                    |
| Average $B$ -factor (Å <sup>2</sup> )   | 47.7                                          | 25.8                                          | 45.5                                          |
| Ramachandran plot                       |                                               |                                               |                                               |
| Most favored region                     | 89.7                                          | 88.3                                          | 90.5                                          |
| Additional allowed region               | 10.3                                          | 11.7                                          | 9.3                                           |
| Generally allowed region                | 0                                             | 0                                             | 0.2                                           |

<sup>a</sup>The numbers in parentheses are statistics from the highest resolution shell.

<sup>b</sup> $R_{\text{merge}} = \sum |I_{\text{obs}} - I_{\text{avg}}| / I_{\text{obs}}$ , where  $I_{\text{obs}}$  is the observed intensity of individual reflection and  $I_{\text{avg}}$  is average over symmetry equivalents.

<sup>c</sup> $R_{\text{work}} = \sum ||F_{\text{o}}| - |F_{\text{c}}|| / \sum |F_{\text{o}}|$ , where  $|F_{\text{o}}|$  and  $|F_{\text{c}}|$  are the observed and calculated structure factor amplitudes, respectively.  $R_{\text{free}}$  was calculated with 5% of the data.

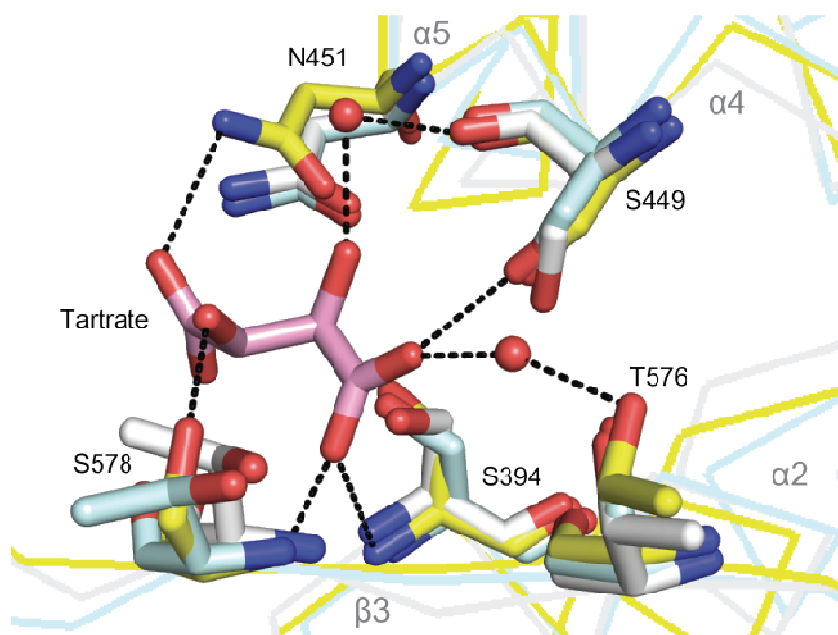

**Figure S1.** Structural superimposition of the active site of *LmPBP4* bound to tartrate on two other PBPs. The residues interacting with tartrate (pink) of *LmPBP4* are shown in yellow bonds and the corresponding residues of *S. aureus* PBP2 (PDB code 3DWK) are colored in gray, and those of *P. aeruginosa* PBP3 (PDB code 3OCL) are colored in pale cyan. The secondary structures of these PBPs are presented as a ribbon model. Water molecules are shown as red spheres, and hydrogen bonds are shown as black dashed lines.
